# Supplementary material for: Homogeneous core/shell Bi2WO6 spherical photocatalysts: their controlled synthesis and enhanced visible-light photocatalytic performances
Source: Royal Society of Chemistry journal article supplement (doi:10.1039/c3ra22630a), 2013-01-01
Supplement: c3ra22630a.pdf [file c3ra22630a.pdf]

Electronic Supplementary Information

**Homogeneous Core/shell  $\text{Bi}_2\text{WO}_6$  Spherical Photocatalysts: Their Controlled  
Synthesis and Enhanced Visible-light Photocatalytic Performances**

Chaochao Mao, Maolin Li, Zhiguo Fang, Fanli Meng, Xiaoni Qu, Yanping Liu, Mengjiao Wang,  
Ji Zhang, Xiaohui Guo\*

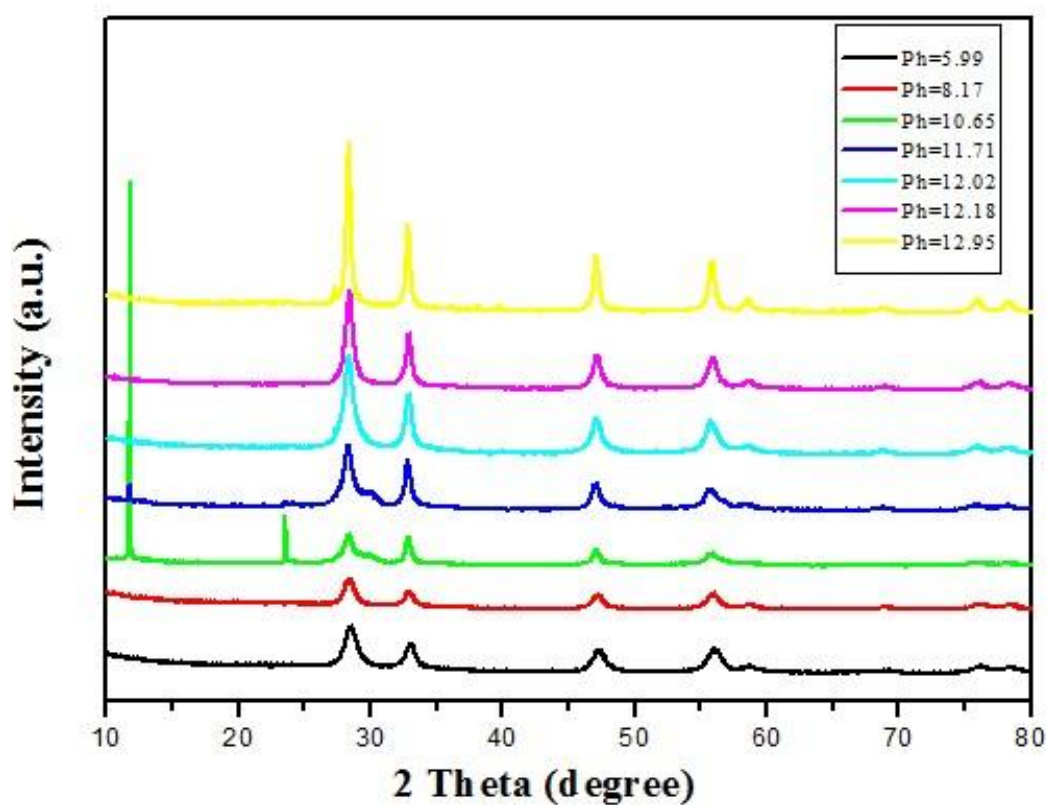

**Figure S1:** XRD patterns of the obtained  $\text{Bi}_2\text{WO}_6$  samples at varying pH via  $160^\circ\text{C}$  solvothermal reaction for 20 h.

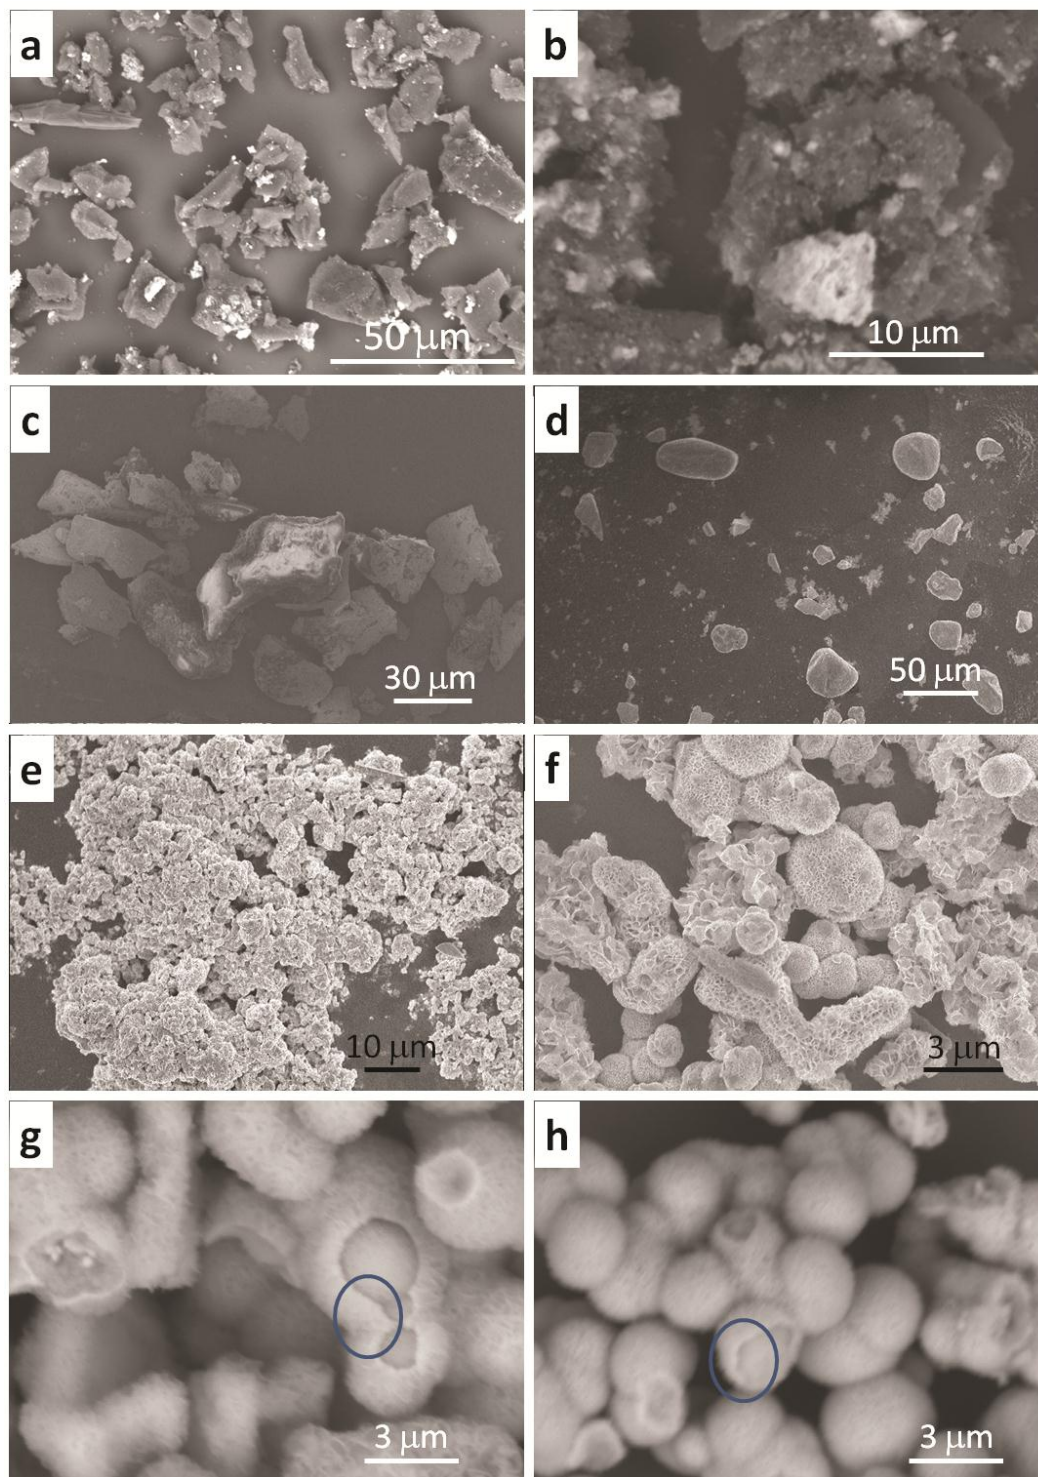

**Figure S2:** SEM images of the obtained Bi<sub>2</sub>WO<sub>6</sub> samples under varying pH reaction conditions via 160°C solvothermal reaction for 20 h, (a) 1.05; (b) 2.65; (c) 5.90; (d) 8.15; (e) 10.65; (f) 11.75; (g) 12.18; (h) 12.95, herein, the circles indicate the formed core/shell structures.

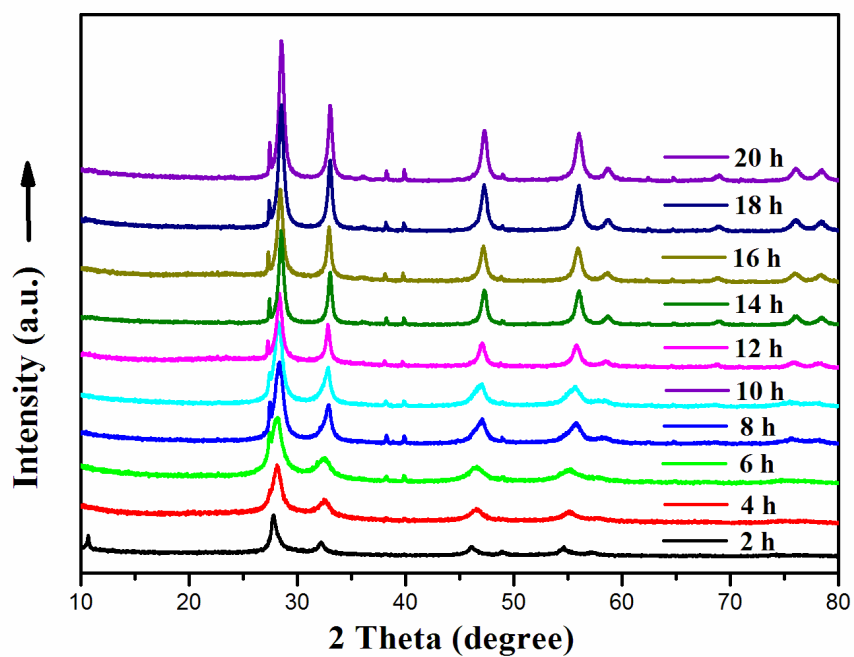

**Figure S3:** XRD patterns of the obtained Bi<sub>2</sub>WO<sub>6</sub> samples via 160 °C solvothermal reaction for different reaction intervals.

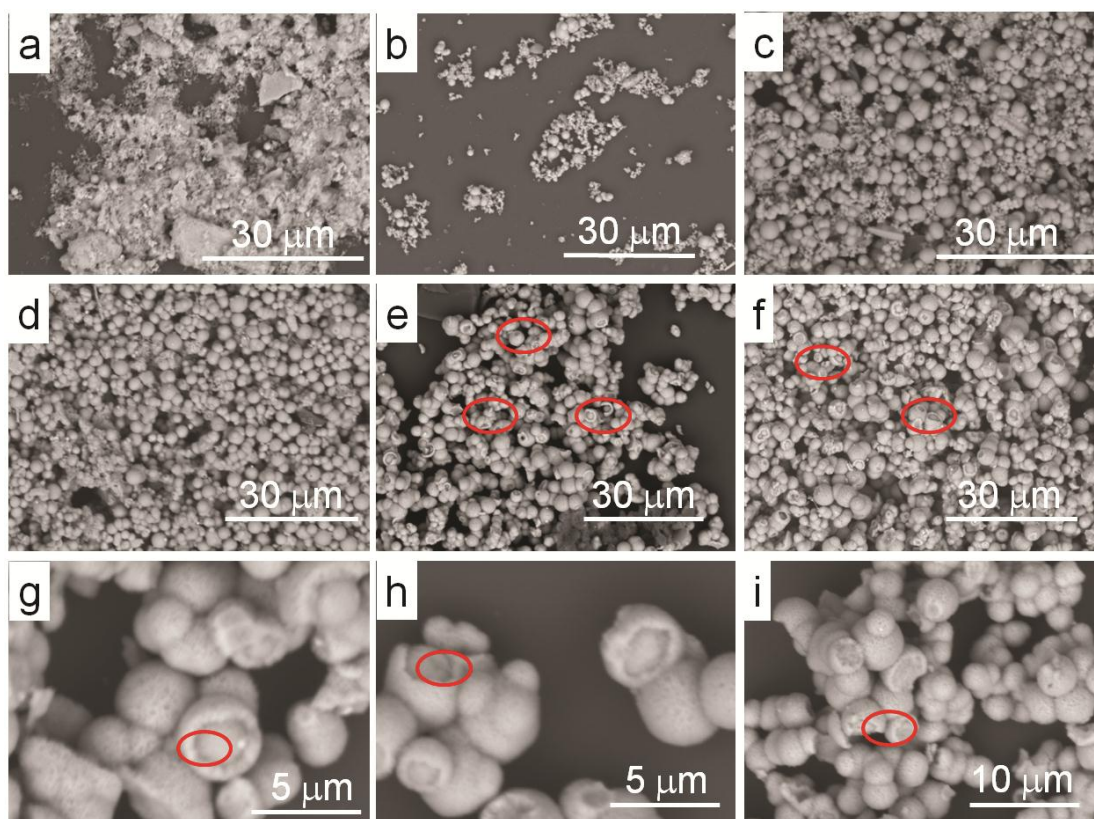

**Figure S4:** SEM images of the obtained  $\text{Bi}_2\text{WO}_6$  samples at varying hydrothermal reaction intervals, a) 2 h; b) 4 h; c) 6 h; d) 8 h; e) 10 h; f) 12 h; g) 14 h; h) 16 h; i) 20 h, wherein, the red circles indicate the formed core/shell structures at different reaction intervals.

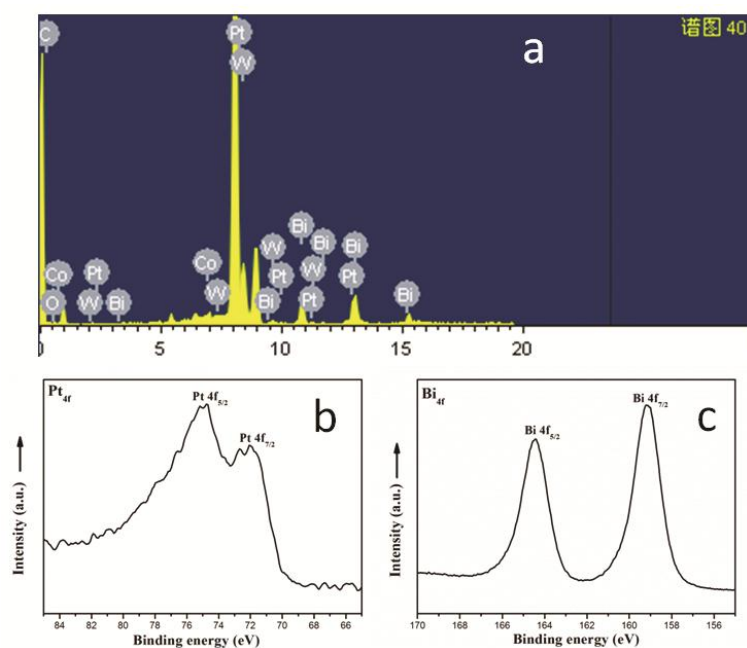

**Figure S5:** Structural and composition analysis for the Pt-loaded core/shell  $\text{Bi}_2\text{WO}_6$  sample, (a) EDS image; (b, c) XPS spectra.

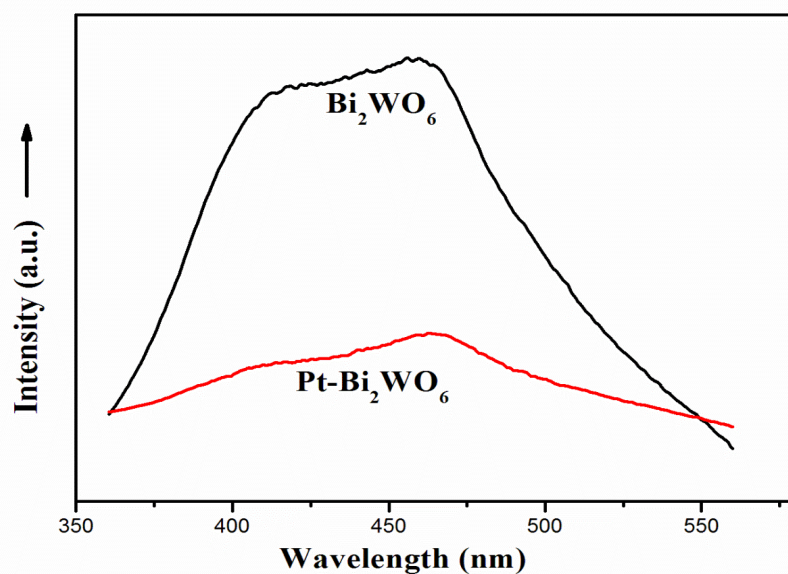

**Figure S6:** PL spectra of the as-made  $\text{Bi}_2\text{WO}_6$  (BWO) based samples; the excitation wavelength was fixed at 320 nm.

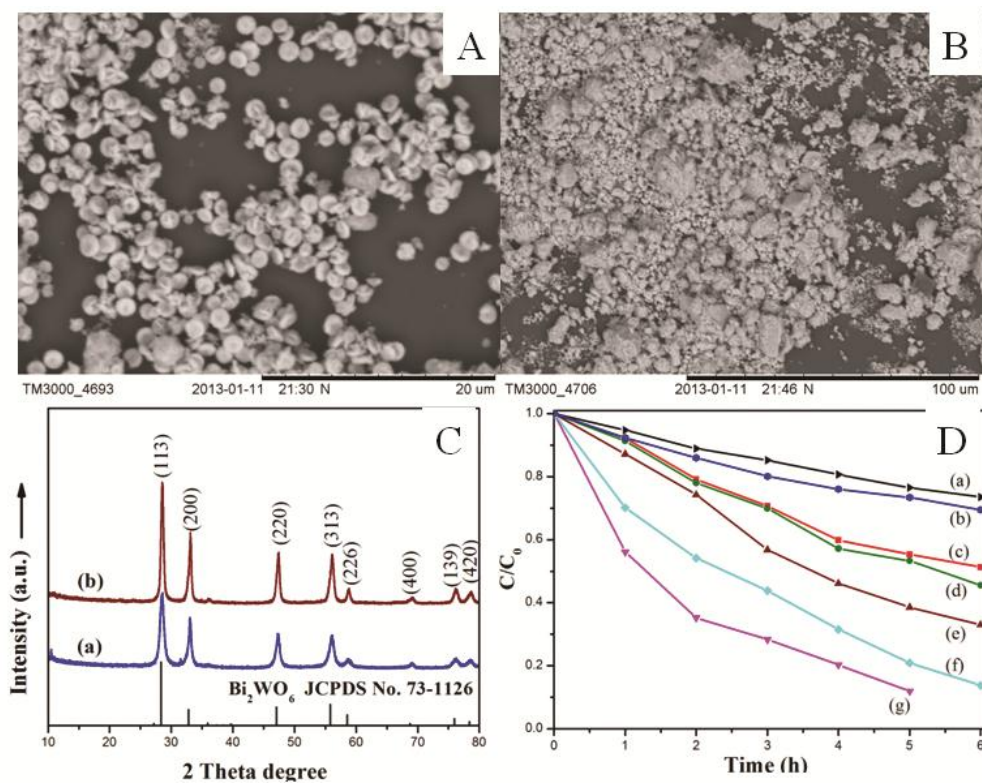

**Figure S7:** Morphology (A and B), structural(C), and UV-Vis spectra analysis of RhB

(D) for the as-prepared  $\text{Bi}_2\text{WO}_6$  samples at different reaction conditions, wherein, sample a was obtained in  $\text{H}_2\text{O}/\text{EG}= 3/1(\text{v/v})$  solution system via  $160^\circ\text{C}$  solvothermal reaction for 20 h; sample b can be obtained in pure EG solution system via  $160^\circ\text{C}$  solvothermal reaction for 20 h, The two samples are formed without addition of PVP. (a) Sample a; (b) Sample b; (c) Sample 1; (d) Sample 2; (e) Sample 3; (f) Pt- loaded  $\text{Bi}_2\text{WO}_6$  composite; (g) Au- loaded  $\text{Bi}_2\text{WO}_6$  composite.

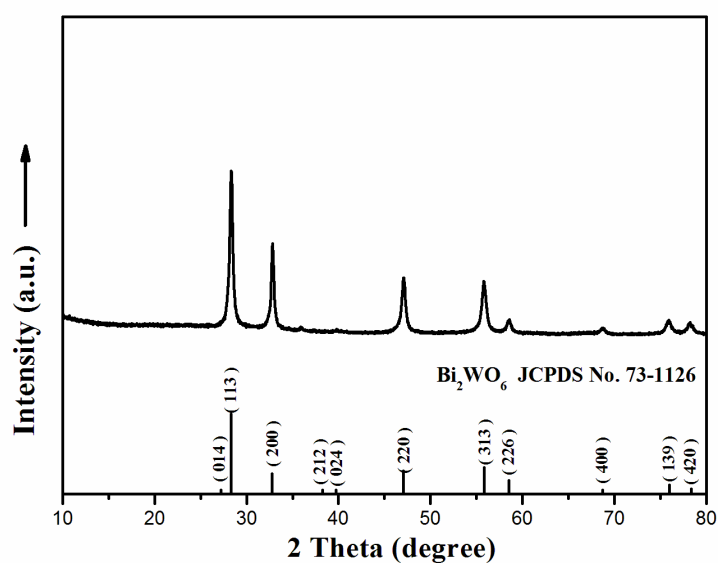

**Figure S8:** XRD pattern of the Pt-loaded  $\text{Bi}_2\text{WO}_6$  sample after undergoing 5 catalytic cycles test.
